# Supplementary material
Source: PubMed Central journal article supplement (PMC4617787)
Supplement: NIHMS729639-supplement.pdf [file NIHMS729639-supplement.pdf]

# Deciphering hepatocellular responses to metabolic and oncogenic stress

Marcelo et al.

## Supplementary Information

**Figure S1.** Percent yield of CD45<sup>+</sup> liver NPF fraction after MACS and gating strategy for isolation of F4/80<sup>+</sup> and VE-cad<sup>+</sup> cells.

**Figure S2.** Assessment of cell surface marker expression within CD95<sup>+</sup> fractions of the liver PF via FACS and fluorescence immunohistochemistry.

**Figure S3.** Assessment of cell surface marker expression within F4/80<sup>+</sup> fractions of the liver NPF via FACS and fluorescence immunohistochemistry.

**Figure S4.** Assessment of cell surface marker expression within VE-cad<sup>+</sup> fractions of the liver NPF via FACS and fluorescence immunohistochemistry.

**Figure S5.** Effect of metabolic and oncogenic stress on cell number and gene expression of various hepatic cell subfractions.

**Figure S6.** Comparison of gene expression signature from HFD-treated hepatic cell types to a murine obese liver gene set.

**Figure S7.** Gene ontological analyses observed between HFD-treated liver cell types and human obese gene set.

**Figure S8.** Gene ontological analyses observed between DEN-treated liver cell types and human HCC gene set.

**Table S1.** Anti-mouse antibodies and their respective fluorochrome conjugates used for flow cytometric analysis.

**Table S2.** Primary antibodies used in immunohistochemical staining of liver sections.

**Table S3.** List of actual magnifications for histological and cell culture images in each figure.

Supplementary information of this article can be found online at <http://www.jbmethods.org/jbm/rt/suppFiles/77>.

**A. CD45+ Enrichment After MACS**

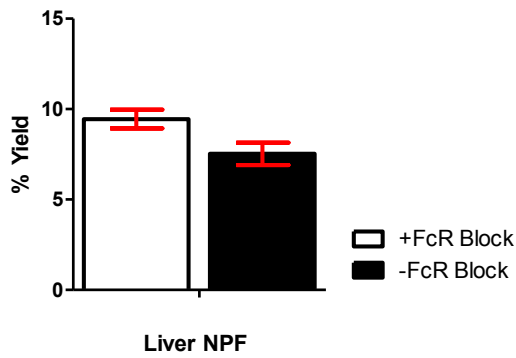

**B. CD45+ Fraction**

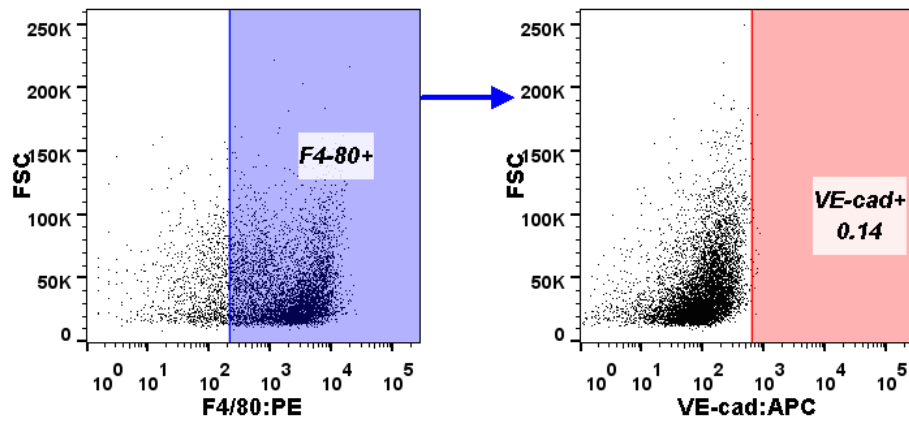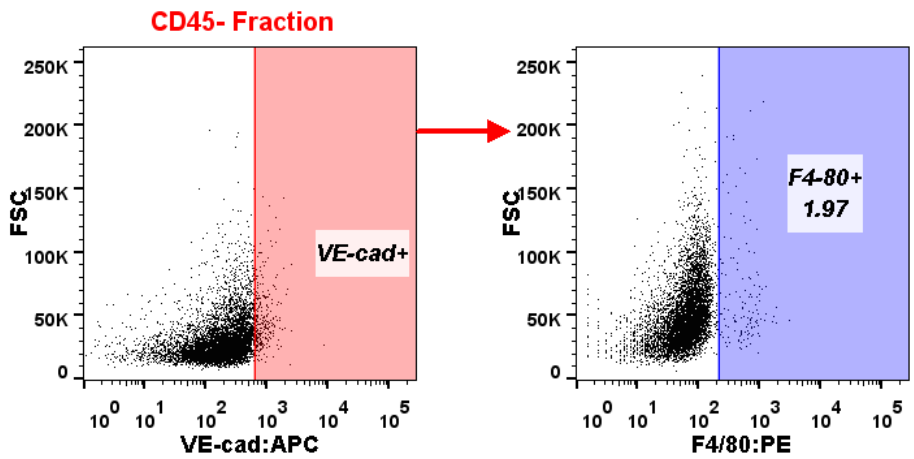

**Isotype Controls**

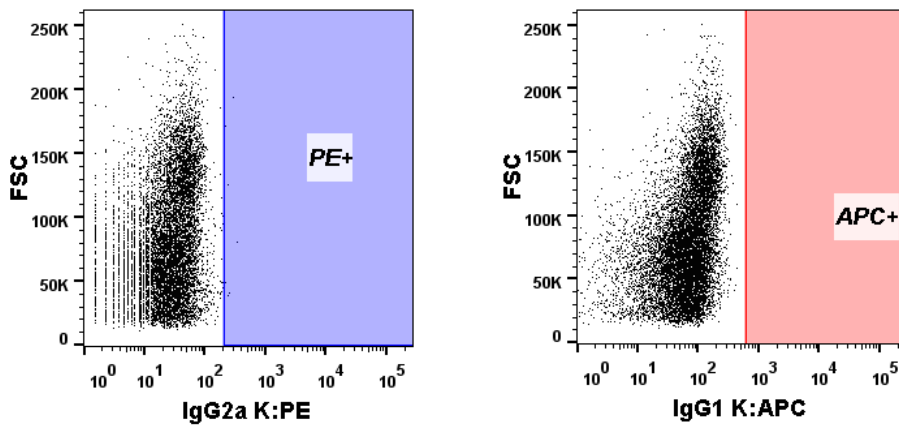

**Figure S1. A.** Comparison of percent yield of CD45<sup>+</sup> fraction isolated from liver NPF following enrichment via MACS, with or without an FcR block step. **B.** Gating strategy for isolation of F4/80<sup>+</sup> cells within CD45<sup>+</sup> fraction (blue gate, top panels), and of VE-cad<sup>+</sup> cells within CD45<sup>-</sup> fraction (red gate, bottom panels) from liver. Also shown are representative plots for assessment of contaminating VE-cad<sup>+</sup> cells (red gate, top panels) within F4/80<sup>+</sup>CD45<sup>+</sup> macrophage fraction (blue gate, top), and contaminating F4/80<sup>+</sup> cells (blue gate, bottom panels) within VE-cad<sup>+</sup>CD45<sup>-</sup> SEC fraction (red gate, bottom panels). The percentage values of contaminating cells, as indicated within each gate, are negligible. FACS plots showing staining using IgG isotype control are also shown.

\*\*\*

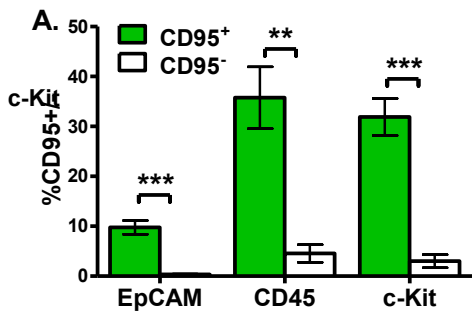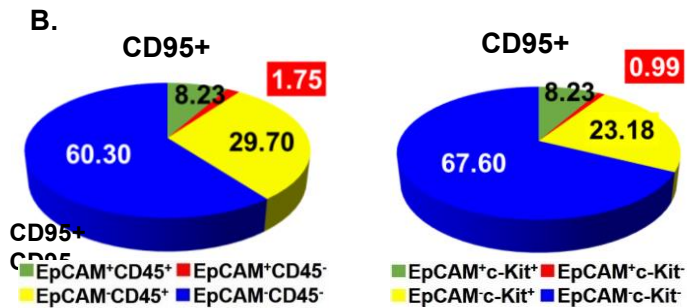

**C. CD95 Alb DAPI Merge**

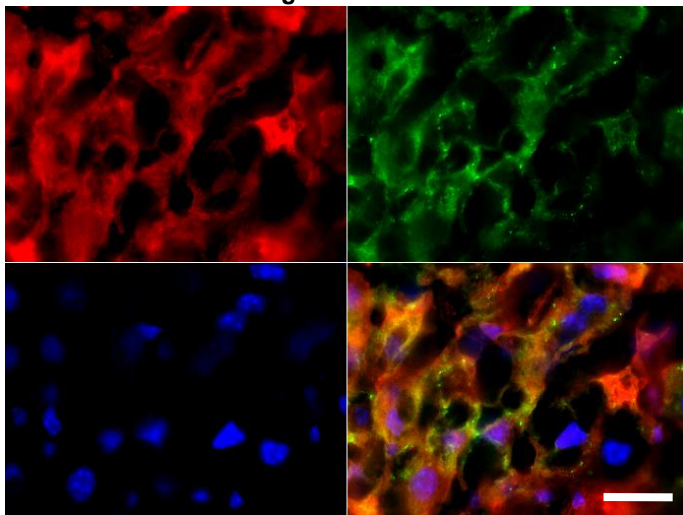

**D. CD95 CK8 DAPI Merge**

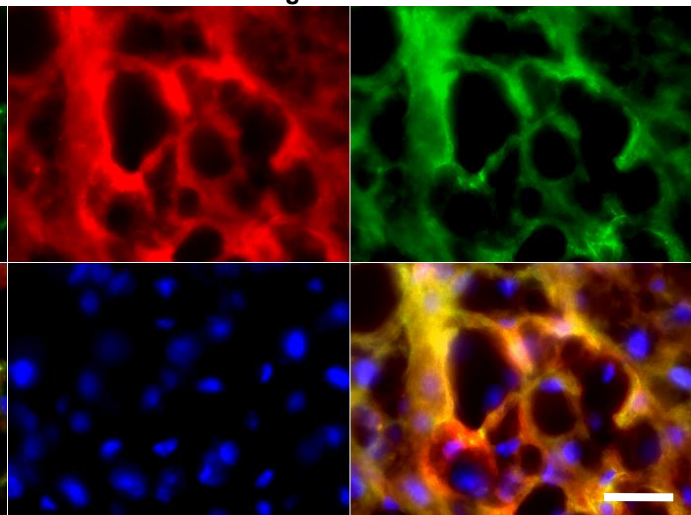

**E. CD95 EpCAM DAPI Merge**

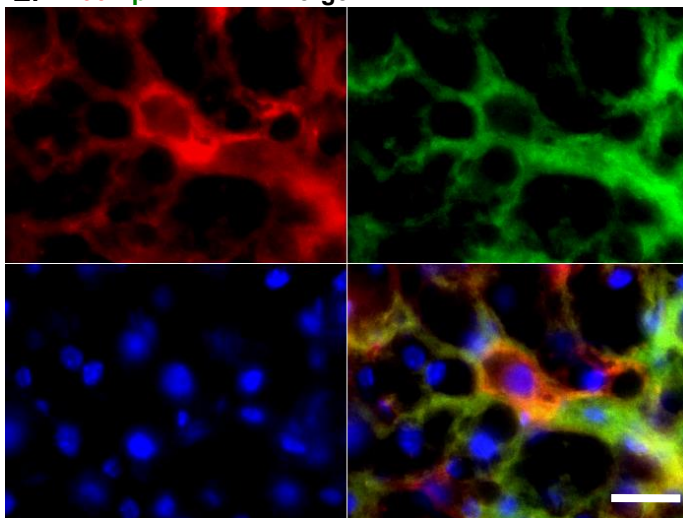

**Figure S2. A.** Frequency of antigenic cell surface marker expression by CD95<sup>+</sup> versus CD95<sup>-</sup> cells of the liver parenchymal fraction, as determined by flow cytometry. **B.** Proportion of CD95<sup>+</sup> PH co-expressing select cell surface markers commonly associated with hepatocytes. **C-E.** Fluorescence immunostaining of normal murine liver reveals co-expression of CD95 (red) with the mature hepatocyte markers Albumin (Alb, **C**), cytokeratin 8 (CK8, **D**) and Epithelial Cell Adhesion Molecule (EpCAM, **E**). All scale bars represent 20  $\mu\text{m}$ .

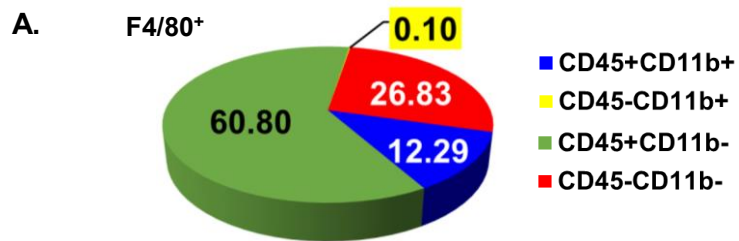

B. F4/80 CD45 DAPI Merge

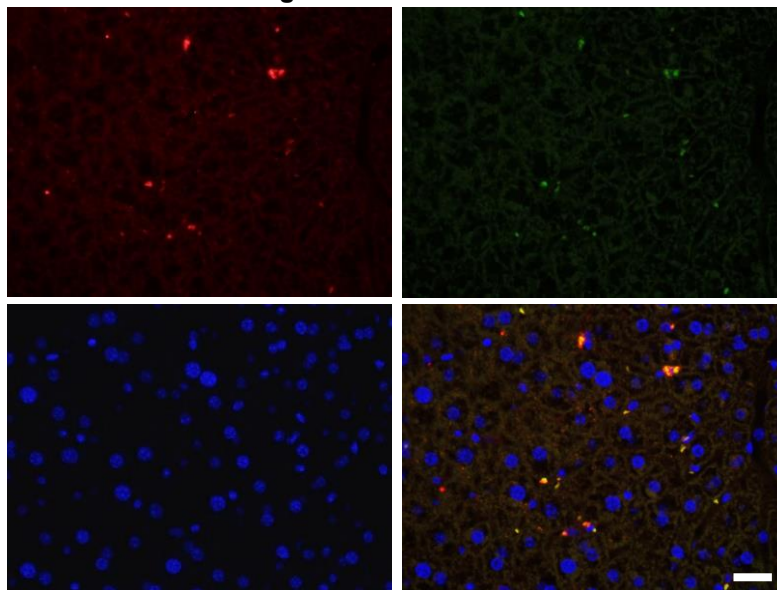

C. F4/80 CD11b DAPI Merge

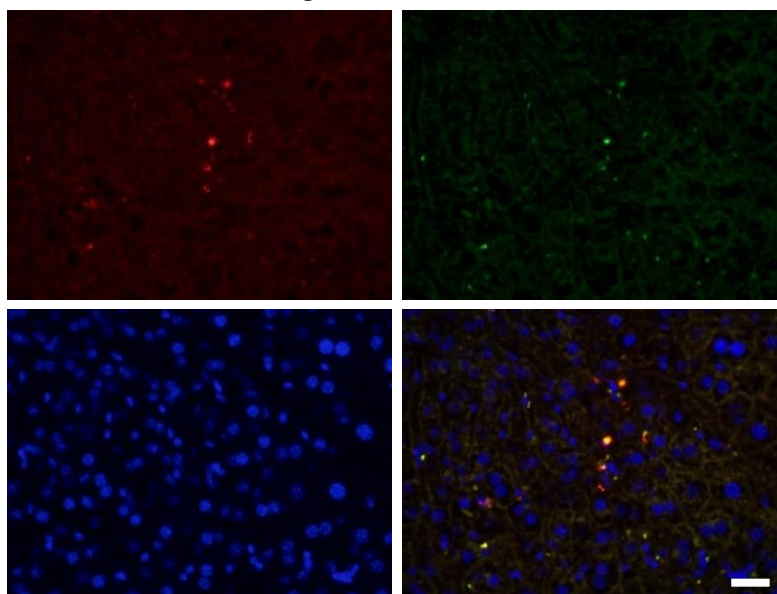

**Figure S3. A.** Distribution of characteristic M $\Phi$  surface marker expression on F4/80<sup>+</sup> cells isolated from liver NPF. **B and C.** Immunostaining of murine liver sections demonstrating co-expression of F4/80 with CD45 (**B**) and F4/80 with CD11b (**C**).



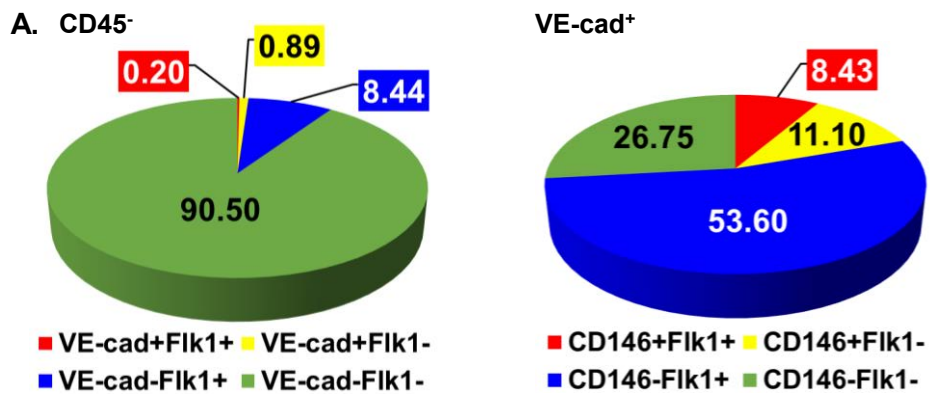

**B. VE-cad CD31 DAPI Merge**

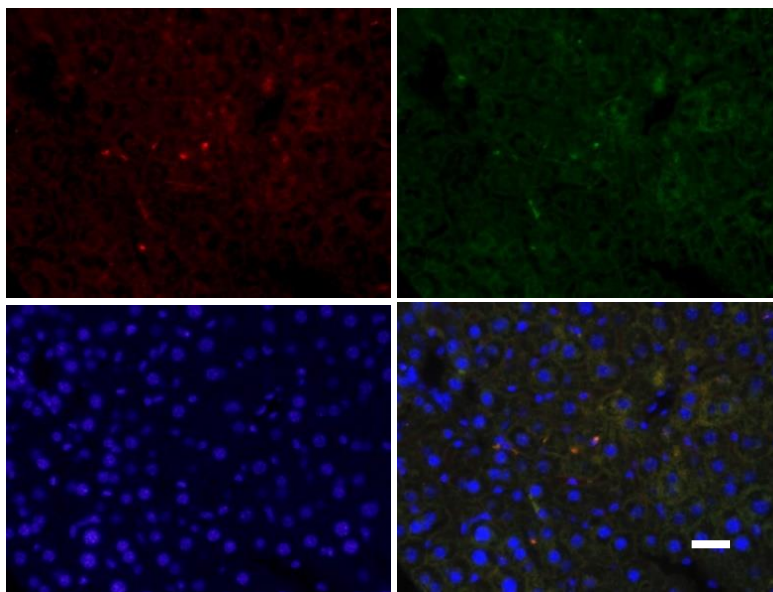

**C. VE-cad Flk1 DAPI Merge**

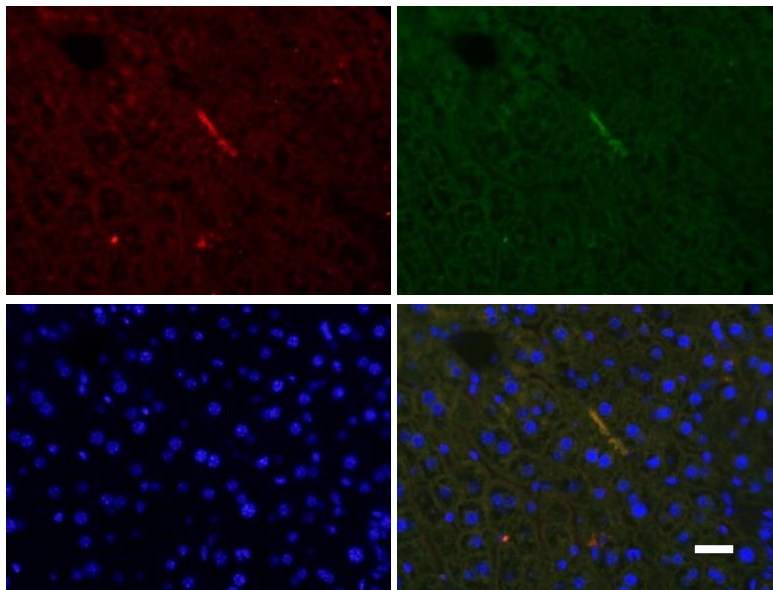



**Figure S4. A.** Distribution of characteristic SEC surface marker expression on CD45<sup>-</sup> or VE-cadherin<sup>+</sup> cells isolated from liver NPF. **B and C.** Immunostaining of murine liver sections demonstrating co-expression of VE-cadherin with CD31 (**B**) and Flk1 (**C**) on cells lining the sinusoids. All scale bars represent 20  $\mu$ m.

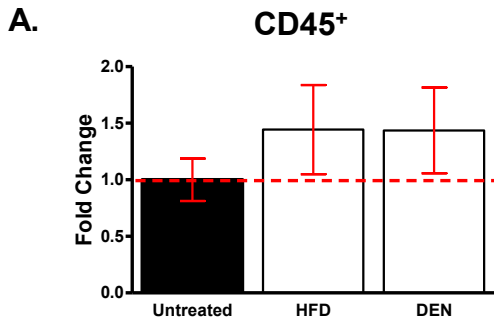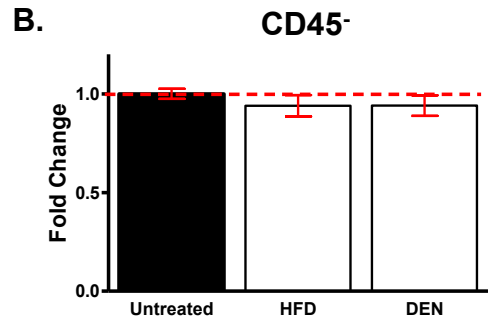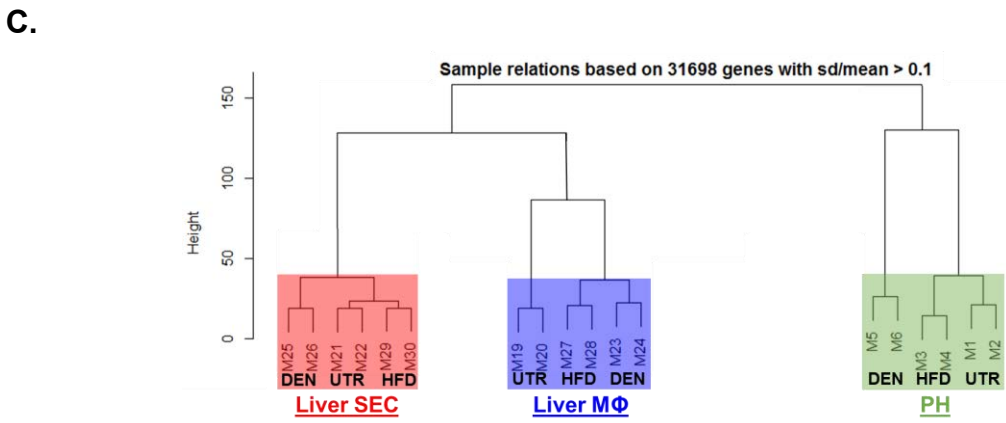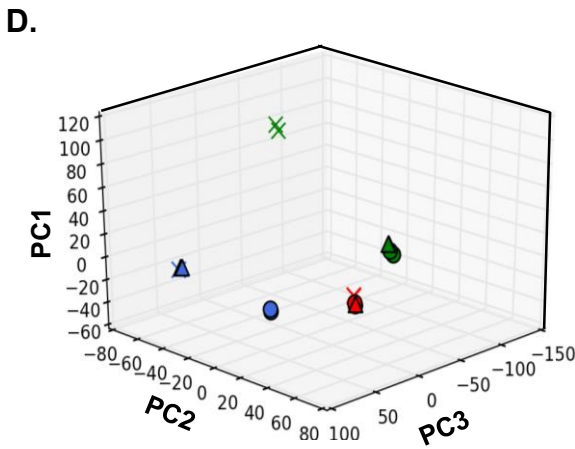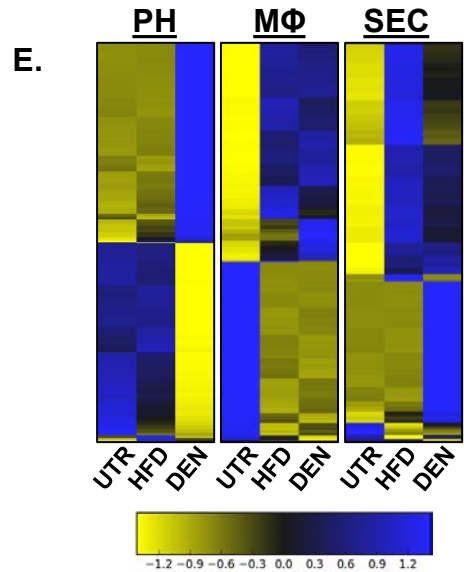

Figure S5 (continued)

F.

■ HFD ■ DEN

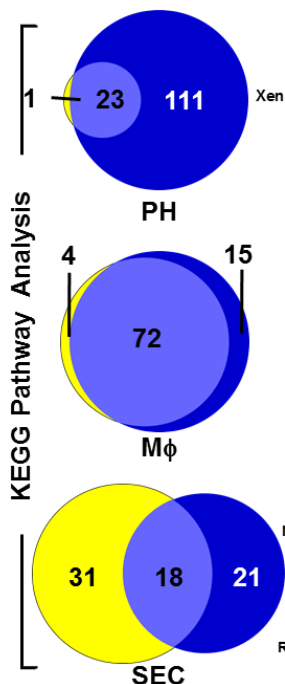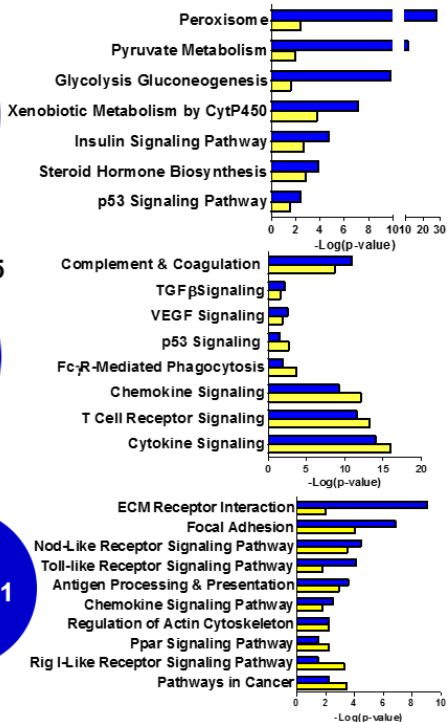

G.

■ HFD ■ DEN

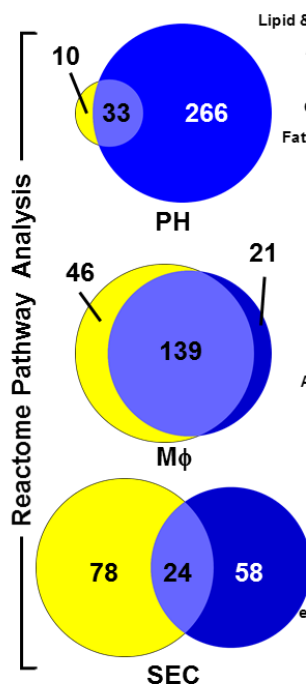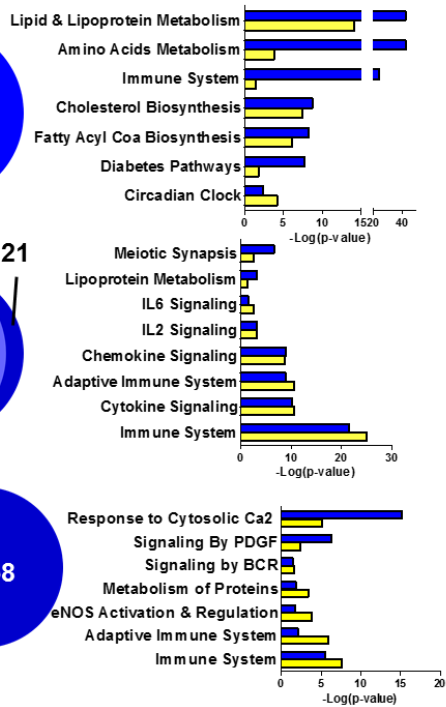

**Figure S5. A and B.** Percentages of CD45<sup>+</sup> (**A**) and CD45<sup>-</sup> (**B**) cells from liver NPF remain unchanged relative to untreated after HFD or DEN treatment. **C.** Hierarchical clustering of normalized microarray data from replicates of PH, MΦ, and SEC isolated from untreated (UTR), HFD, and DEN-treated liver. **D.** Three-dimensional Principal Component Analysis (PCA) plots of replicates of PH, MΦ, and SEC isolated from liver UTR, HFD-, and DEN-treated mice utilized for microarray. **E.** Comparative global gene expression patterns of PH, MΦ, and SEC co-isolated from the liver of UTR, HFD, and DEN-treated mice. **F and G.** Commonality of altered pathways determined via KEGG Pathways (**F**) and Reactome Pathways (**G**) functional analyses observed between PH, MΦ, and SEC isolated from HFD- and DEN-treated murine liver.

A.

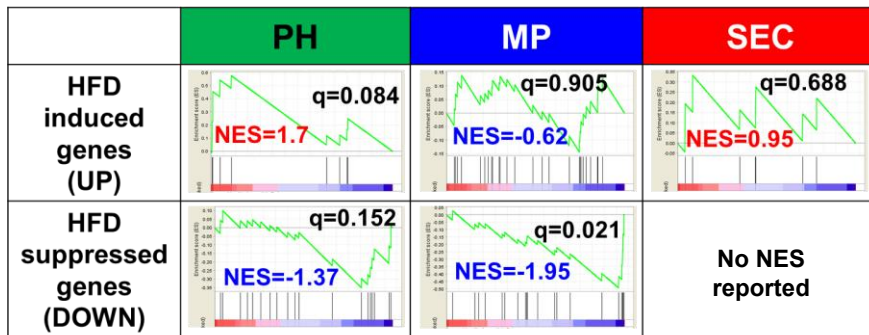

B.

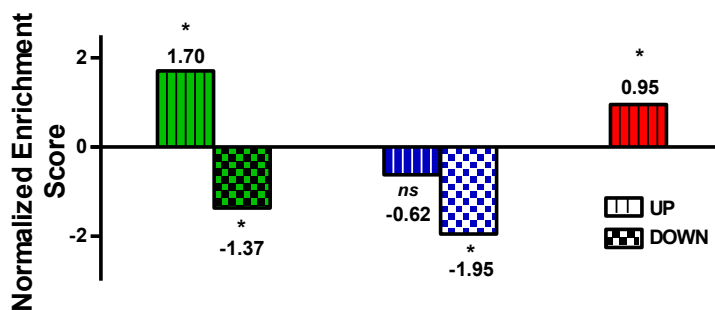

C. [i]

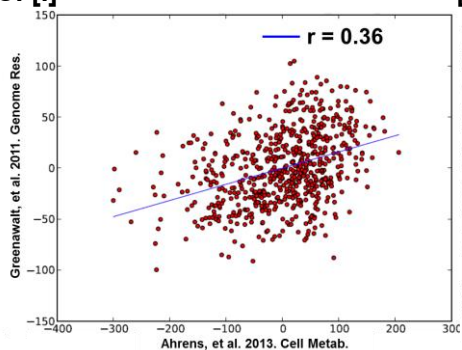

[ii]

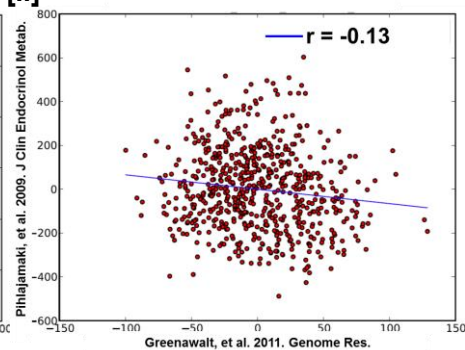

[iii]

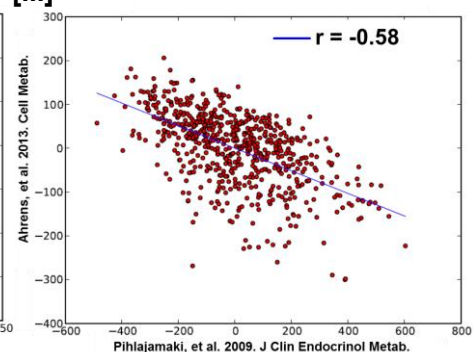

**Figure S6. A.** Association of gene expression signature of HFD-treated liver PH, M $\Phi$ , and SEC with signature derived from murine obese livers [23], via the GSEA method. Of all three cell types, only PH demonstrated a gene expression signature (both upregulated and down-regulated) that matched the murine obese liver signature. **B.** Normalized enrichment scores (NES) of HFD-induced (UP) and HFD-suppressed (DOWN) genes relative to the murine obese liver signature from [23]. **C.** Scatter plots showing correlation of gene expression signature scores between any two of a total of three human obese liver gene data sets [21-22].

A.

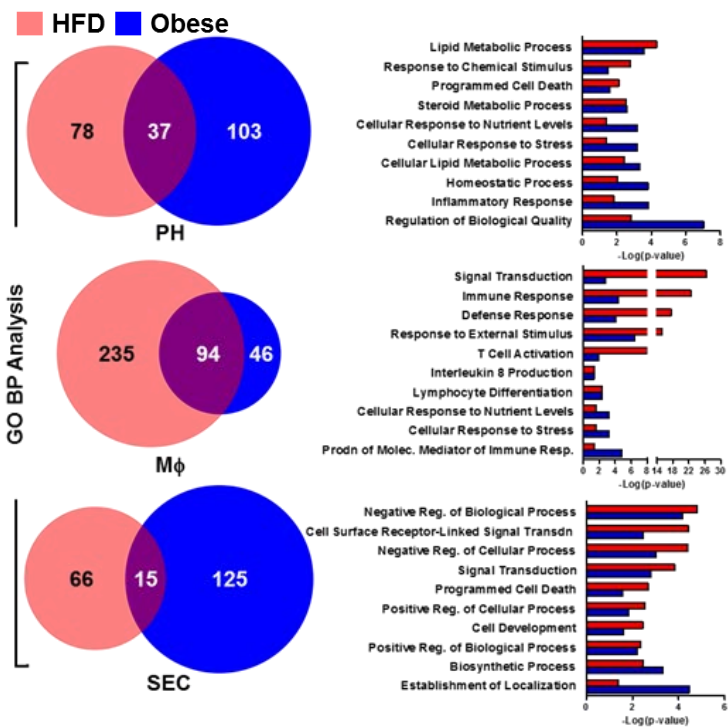

B.

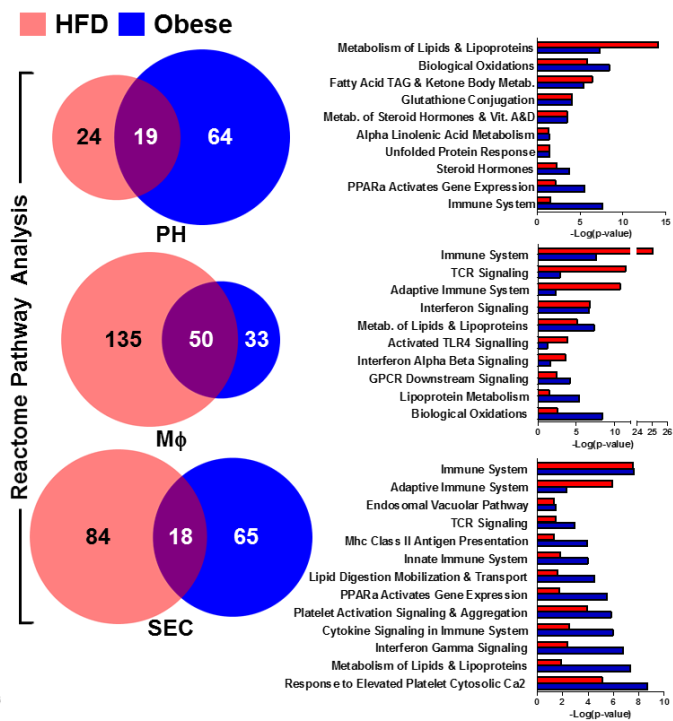



**Figure S7.** Commonality of altered pathways determined via Gene Ontology-Biological Pathways (GO BP) **(A)** and Reactome Pathways **(B)** functional analyses observed between HFD-treated PH, MΦ, or SEC and human obese liver gene signature from [20].

A.

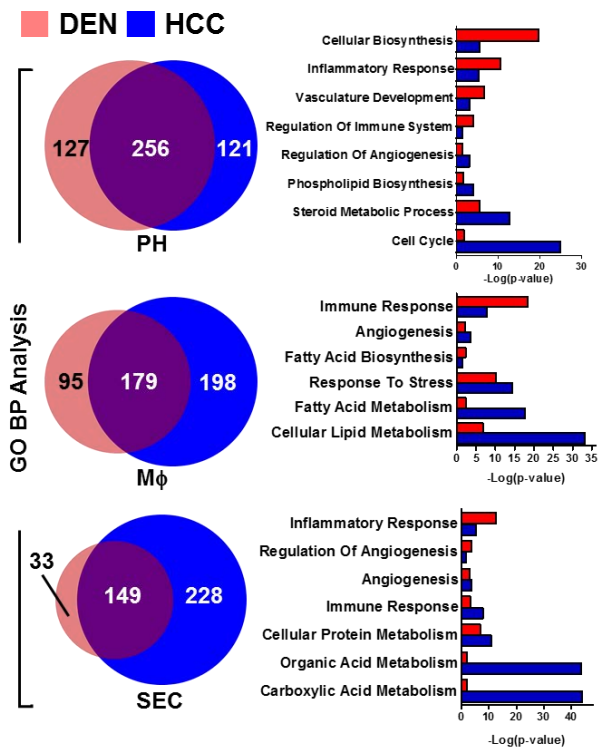

B.

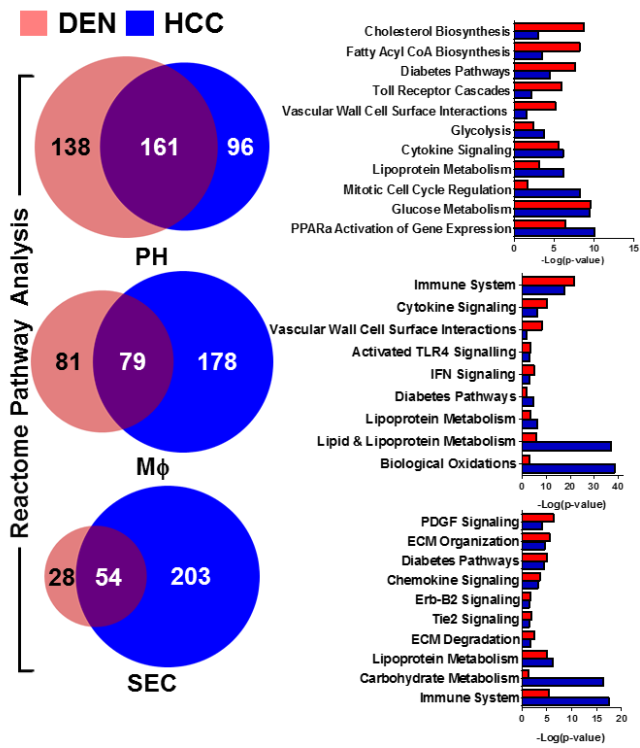

C. [i]

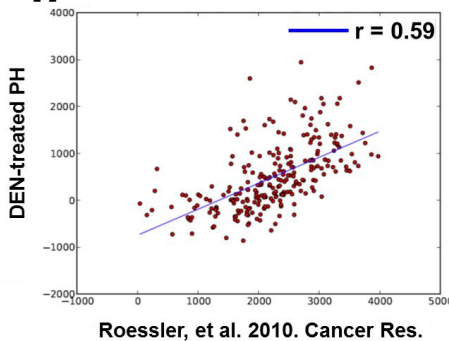

[ii]

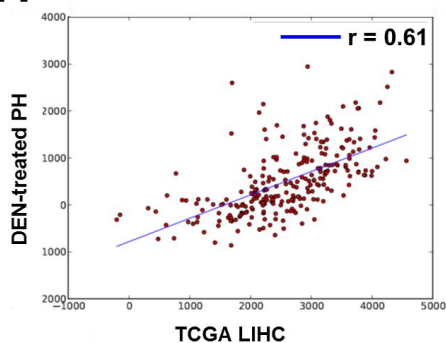

[iii]

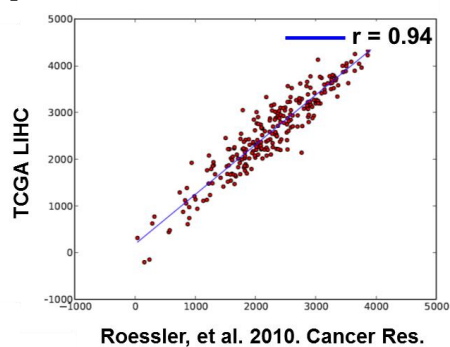

**Figure S8. A and B.** Commonality of altered pathways determined via Gene Ontology-Biological Pathways (GO BP) **(A)** and Reactome Pathways **(B)** functional analyses observed between DEN-treated PH, M $\Phi$ , or SEC and human HCC gene signature from [18,19]. **C.** Scatter plots showing correlation of gene expression signatures between **[i]** DEN-treated PH and human HCC gene set from [18,19]. **[ii]** DEN-treated PH and human HCC gene set from TCGA-LIHC, and **[iii]** human HCC gene sets from [18,19] and TCGA-LIHC.

## SUPPLEMENTARY TABLES

**Supplementary Table 1.** Anti-mouse antibodies and their respective fluorochrome conjugates used for flow cytometric analysis.

| Antigen/Target                            | Fluorochrome Conjugate | Clone             |
|-------------------------------------------|------------------------|-------------------|
| <b>Hepatocyte Markers</b>                 |                        |                   |
| CD95                                      | APC                    | 15A7              |
| Epithelial Cell Adhesion Molecule (EpCAM) | PE-Cy7                 | G8.8              |
| c-Kit                                     | PE                     | 2B8               |
| CD45                                      | eFluor 780             | 30-F11            |
|                                           |                        |                   |
| <b>Macrophage Markers</b>                 |                        |                   |
| F4/80                                     | PE                     | BM8               |
| CD45                                      | eFluor 780             | 30-F11            |
| CD11b                                     | PE-Cy7                 | M1/70             |
| CD16/32                                   | AlexaFluor 700         | 93                |
|                                           |                        |                   |
| <b>Endothelial Cell Markers</b>           |                        |                   |
| VE-cadherin                               | APC, eFluor 450        | BV13              |
| CD31                                      | APC                    | 390               |
| Flk1                                      | PE                     | Avas12 $\alpha$ 1 |
| CD105                                     | PE                     | Mj7/18            |
| CD146                                     | FITC                   | P1H12             |

**Supplementary Table 2.** Primary antibodies used in immunohistochemical staining of liver sections.

| <b>Antigen/Target</b> | <b>Host Species</b> | <b>Clone</b> |
|-----------------------|---------------------|--------------|
| CD95                  | Mouse               | 15A7         |
| Albumin               | Rat                 | 1D6          |
| EpCAM                 | Rat                 | G8.8         |
| Cytokeratin 8 (CK8)   | Rat                 | SP2/0        |
| F4/80                 | Goat                | A-19         |
| CD45                  | Rat                 | 30-F11       |
| VE-cadherin           | Goat                | NS0          |
| CD31                  | Rat                 | MEC 13.3     |

**Supplementary Table 3.** List of actual magnifications for histological and cell culture images in each figure.

| <b>Figure</b>   | <b>Scale bar (<math>\mu\text{m}</math>)</b> | <b>Image Magnification</b> |
|-----------------|---------------------------------------------|----------------------------|
| 1A[i]           | 20                                          | 228.6                      |
| 2B[i]           | 20                                          | 228.6                      |
| 2B[ii]          | 20                                          | 457.2                      |
| 2B[iii]         | 20                                          | 457.2                      |
| 2C[i]           | 20                                          | 228.6                      |
| 2C[ii]          | 20                                          | 228.6                      |
| 3C[i]           | 20                                          | 317.5                      |
| 3C[ii]          | 20                                          | 317.5                      |
| 3C[iii]         | 20                                          | 317.5                      |
| 3C[iv]          | 20                                          | 317.5                      |
| 3D[ii]          | 20                                          | 317.5                      |
| 4C[i]           | 20                                          | 317.5                      |
| 4C[ii]          | 20                                          | 317.5                      |
| 4C[iii]         | 20                                          | 317.5                      |
| 4C[iv]          | 20                                          | 317.5                      |
| 4E              | 200                                         | 31.75                      |
| 5C (H&E panels) | 20                                          | 76.2                       |
| 5C (IHC panels) | 20                                          | 152.4                      |
